# Supplementary material for: International incidence of melanoma in heart transplant recipients: a meta-analysis
Source: PubMed Central journal article supplement — Melanoma Res. 2024 Oct 7;35(1):24–30. doi: 10.1097/CMR.0000000000001008 (PMC11670907; doi:10.1097/cmr.0000000000001008), 2024-10-07

## Leave-One-Out Meta-Analysis

| Excluded Study      | Overall Effect Size (RR) | 95% CI       | I <sup>2</sup> |
|---------------------|--------------------------|--------------|----------------|
| None (All included) | 2.21                     | [1.32, 3.71] | 75.4           |
| Kellerman 2009      | 2.13                     | [1.23, 3.71] | 77             |
| Jensen 2010         | 2.24                     | [1.31, 3.82] | 78.1           |
| Jiang 2010          | 2.16                     | [1.24, 3.77] | 77.3           |
| Krynitz 2012        | 2.2                      | [1.27, 3.84] | 77.8           |
| Na 2013             | 2.07                     | [1.21, 3.55] | 63.3           |
| Robbins 2015        | 2.8                      | [2.12, 3.70] | 0              |
| Secnikova 2015      | 2.19                     | [1.26, 3.82] | 77.8           |
| Fattouh 2017        | 2.45                     | [1.41, 4.25] | 77.4           |
| Holmberg 2019       | 2.08                     | [1.21, 3.59] | 76.2           |
| Liu 2023            | 2.09                     | [1.23, 3.55] | 76.7           |

## GRADE (Certainty of Evidence)

| Outcomes                  | Effect Size (95% CI)      | N <sup>o</sup> of Trials         | Certainty of the evidence (GRADE)                                                                           |
|---------------------------|---------------------------|----------------------------------|-------------------------------------------------------------------------------------------------------------|
| Relative Risk of Melanoma | RR 2.21<br>(1.32 to 3.71) | (10<br>Observational<br>Studies) |  <sup>a,b</sup><br>Low |

a. High heterogeneity (I<sup>2</sup>=75%)

b. Large magnitude of effect (RR>2)

# ROBIN-I Tool for Risk of Bias

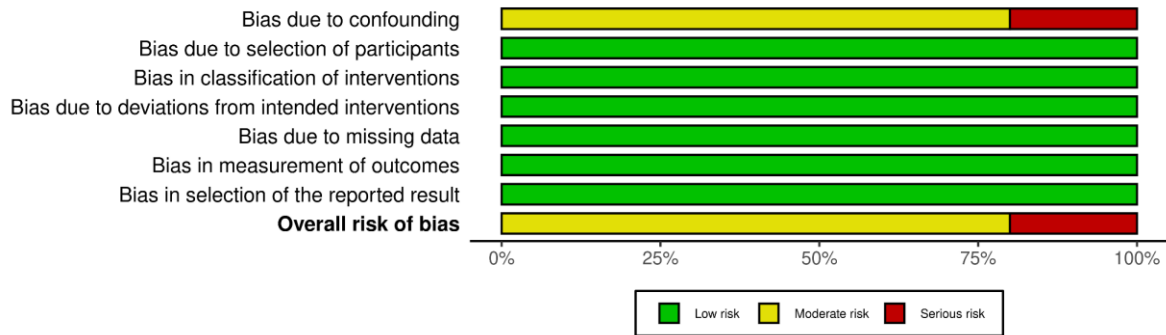

| Study                  | Risk of bias domains |    |    |    |    |    |    | Overall |
|------------------------|----------------------|----|----|----|----|----|----|---------|
|                        | D1                   | D2 | D3 | D4 | D5 | D6 | D7 |         |
| Krynitz et al., 2012   | ⊗                    | +  | +  | +  | +  | +  | +  | ⊗       |
| Jensen et al., 2010    | ⊗                    | +  | +  | +  | +  | +  | +  | ⊗       |
| Jiang et al., 2010     | -                    | +  | +  | +  | +  | +  | +  | -       |
| Kellerman et al., 2009 | -                    | +  | +  | +  | +  | +  | +  | -       |
| Na et al., 2013        | -                    | +  | +  | +  | +  | +  | +  | -       |
| Robbins et al., 2015   | -                    | +  | +  | +  | +  | +  | +  | -       |
| Secnikova et al., 2015 | -                    | +  | +  | +  | +  | +  | +  | -       |
| Fattouh et al., 2017   | -                    | +  | +  | +  | +  | +  | +  | -       |
| Holmberg et al., 2019  | -                    | +  | +  | +  | +  | +  | +  | -       |
| Liu et al., 2023       | -                    | +  | +  | +  | +  | +  | +  | -       |

Domains:  
D1: Bias due to confounding.  
D2: Bias due to selection of participants.  
D3: Bias in classification of interventions.  
D4: Bias due to deviations from intended interventions.  
D5: Bias due to missing data.  
D6: Bias in measurement of outcomes.  
D7: Bias in selection of the reported result.

Judgement  
⊗ Serious  
- Moderate  
+ Low

# Egger's Test for Publication Bias

Regression test for Funnel plot asymmetry ("Egger's test") ▼

|     | z     | p     |
|-----|-------|-------|
| sei | 0.908 | 0.364 |

Plot

Funnel Plot

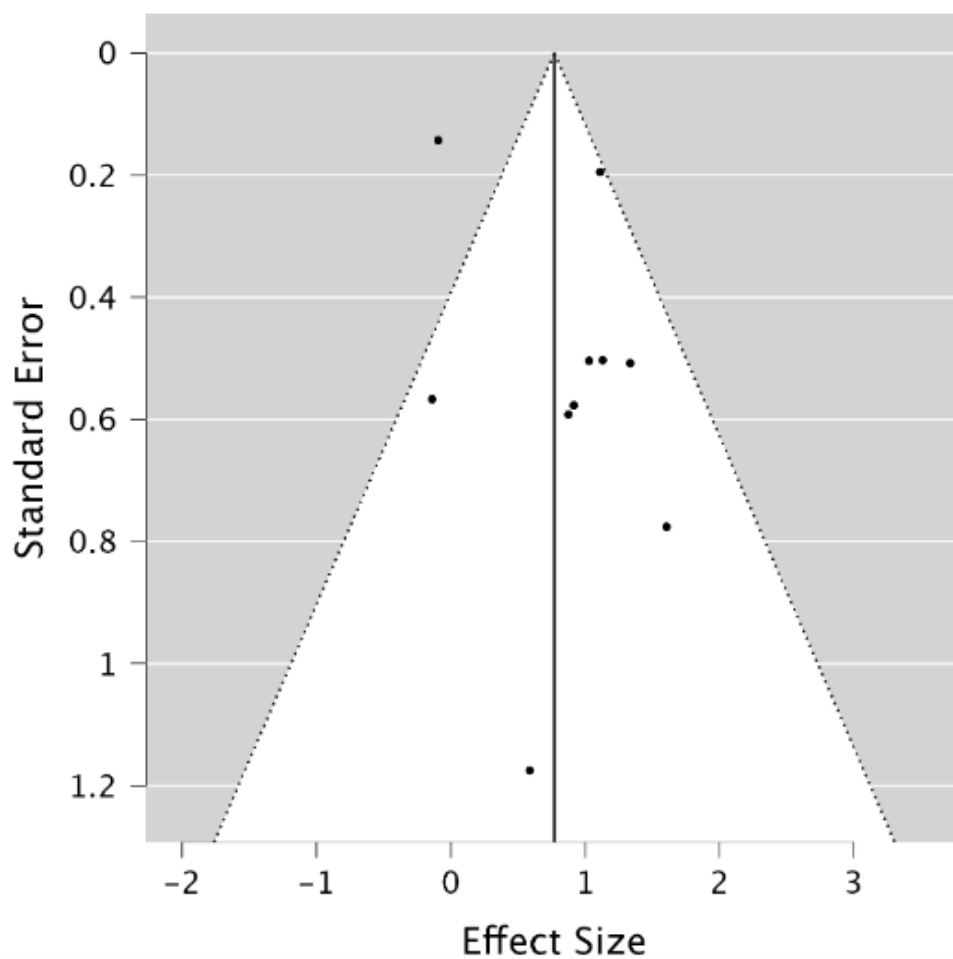

Supplement: mr-35-24-s003.pdf [file mr-35-24-s003.pdf]
