# Supplementary material for: International incidence of melanoma in heart transplant recipients: a meta-analysis
Source: PubMed Central journal article supplement — Melanoma Res. 2024 Oct 7;35(1):24–30. doi: 10.1097/CMR.0000000000001008 (PMC11670907; doi:10.1097/cmr.0000000000001008), 2024-10-07
Supplement: mr-35-24-s002.pdf [file mr-35-24-s002.pdf]

Relative risk of melanoma in patients with heart transplant compared to the general population:  
Literature review

| PUBMED 7/31/24 | Population | Intervention             | Comparison | Outcome                                         |
|----------------|------------|--------------------------|------------|-------------------------------------------------|
|                |            | "Heart transplant"[Mesh] |            | Skin Neoplasms"[Mesh]<br>OR<br>"Melanoma"[Mesh] |
| Total studies  | 192        |                          |            |                                                 |

| EMBASE 7/31/24  | Population | Intervention               | Comparison | Outcome                                                         | Study                                             |
|-----------------|------------|----------------------------|------------|-----------------------------------------------------------------|---------------------------------------------------|
|                 |            | Heart Graft + all synonyms |            | Melanoma + all synonyms<br><br>OR<br>Skin cancer + all synonyms | RCT + Observational + retrospective + prospective |
| Total studies = | 102        |                            |            |                                                                 |                                                   |

Total studies: 192 (Pubmed) + 102 (EMBASE) = 294

Pubmed exclusions with filters: 0 filters = 0 excluded

Duplicates 26: 13 removed

Total remaining assessed for eligibility: 281

- Reason for exclusions:
  - Not an observational study
  - Not full text
  - Not heart transplant
  - Not Melanoma
  - Control group not the general population

Studies to be analyzed: 9
